# Supplementary material for: Prediction by Graph Theoretic Measures of Structural Effects in Proteins Arising from Non-Synonymous Single Nucleotide Polymorphisms
Source: PubMed Central journal article supplement (PMC2447880; doi:10.1371/journal.pcbi.1000135), 2008-07-25
Supplement: pcbi.1000135.s001.pdf [file pcbi.1000135.s001.pdf]

**Dataset S1A:** The 113 mutations that have negligible structural effects.

| Wild<br>type<br>(WT)<br>protein | Mutant<br>type<br>(MT)<br>protein | Residue<br>number | WT<br>amino<br>acid | MT<br>amino<br>acid | WT<br>Resolution<br>(Å) | MT<br>Resolution<br>(Å) | RMSD<br>(Å) | <i>Bongo</i><br>predict<br>ion* |
|---------------------------------|-----------------------------------|-------------------|---------------------|---------------------|-------------------------|-------------------------|-------------|---------------------------------|
| 1bni                            | 1ban                              | 91                | S                   | A                   | 2.1                     | 2.2                     | 0.23        | -                               |
| 1bni                            | 1bao                              | 78                | Y                   | F                   | 2.1                     | 2.2                     | 0.34        | -                               |
| 1bni                            | 1bns                              | 26                | T                   | A                   | 2.1                     | 2.05                    | 0.23        | -                               |
| 1bni                            | 1brg                              | 7                 | F                   | L                   | 2.1                     | 2.2                     | 0.37        | Y                               |
| 1bni                            | 1brh                              | 14                | L                   | A                   | 2.1                     | 2.0                     | 0.35        | -                               |
| 1bni                            | 1bri                              | 76                | I                   | A                   | 2.1                     | 1.9                     | 0.33        | -                               |
| 1bni                            | 1brj                              | 88                | I                   | A                   | 2.1                     | 2.0                     | 0.36        | -                               |
| 1bni                            | 1brk                              | 96                | I                   | A                   | 2.1                     | 2.0                     | 0.38        | -                               |
| 1bni                            | 1bsa                              | 51                | I                   | V                   | 2.1                     | 2.0                     | 0.33        | -                               |
| 1bni                            | 1bsb                              | 76                | I                   | V                   | 2.1                     | 2.0                     | 0.35        | -                               |
| 1bni                            | 1bsc                              | 88                | I                   | V                   | 2.1                     | 2.0                     | 0.35        | -                               |
| 1bni                            | 1bse                              | 89                | L                   | V                   | 2.1                     | 2.0                     | 0.34        | -                               |
| 1lz1                            | lgay                              | 2                 | V                   | G                   | 1.5                     | 1.8                     | 0.35        | -                               |
| 1lz1                            | lgaz                              | 2                 | V                   | I                   | 1.5                     | 1.8                     | 0.29        | -                               |
| 1lz1                            | lgb2                              | 2                 | V                   | M                   | 1.5                     | 1.8                     | 0.34        | -                               |
| 1lz1                            | lgb3                              | 2                 | V                   | F                   | 1.5                     | 1.8                     | 0.29        | -                               |
| 1lz1                            | lgf8                              | 2                 | V                   | S                   | 1.5                     | 1.8                     | 0.3         | -                               |
| 1lz1                            | lgf9                              | 2                 | V                   | Y                   | 1.5                     | 1.8                     | 0.29        | -                               |
| 1lz1                            | lgfa                              | 2                 | V                   | D                   | 1.5                     | 1.8                     | 0.28        | -                               |
| 1lz1                            | lgfe                              | 2                 | V                   | N                   | 1.5                     | 1.8                     | 0.29        | -                               |
| 1lz1                            | lgfg                              | 2                 | V                   | R                   | 1.5                     | 1.8                     | 0.31        | -                               |
| 1lz1                            | lgfh                              | 74                | V                   | Y                   | 1.5                     | 1.8                     | 0.28        | Y                               |
| 1lz1                            | lgfj                              | 74                | V                   | D                   | 1.5                     | 1.8                     | 0.3         | -                               |
| 1lz1                            | lgfk                              | 74                | V                   | N                   | 1.5                     | 1.8                     | 0.26        | -                               |
| 1lz1                            | lgfu                              | 110               | V                   | D                   | 1.5                     | 1.8                     | 0.32        | -                               |
| 1lz1                            | lgfv                              | 110               | V                   | N                   | 1.5                     | 1.8                     | 0.27        | -                               |
| 1lz1                            | 1lhh                              | 110               | V                   | P                   | 1.5                     | 1.8                     | 0.28        | -                               |
| 1lz1                            | 1lhi                              | 71                | P                   | G                   | 1.5                     | 1.8                     | 0.24        | -                               |
| 1lz1                            | 1lhj                              | 103               | P                   | G                   | 1.5                     | 1.8                     | 0.23        | -                               |
| 1lz1                            | 1lhk                              | 91                | D                   | P                   | 1.5                     | 1.8                     | 0.27        | -                               |
| 1lz1                            | 1lhl                              | 47                | A                   | P                   | 1.5                     | 1.8                     | 0.27        | -                               |
| 1lz1                            | loua                              | 56                | I                   | T                   | 1.5                     | 1.8                     | 0.25        | -                               |
| 1lz1                            | loub                              | 100               | V                   | A                   | 1.5                     | 1.8                     | 0.26        | -                               |
| 1lz1                            | loug                              | 2                 | V                   | A                   | 1.5                     | 1.8                     | 0.23        | -                               |
| 1lz1                            | louh                              | 74                | V                   | A                   | 1.5                     | 1.8                     | 0.27        | -                               |
| 1lz1                            | loui                              | 93                | V                   | A                   | 1.5                     | 1.8                     | 0.26        | -                               |
| 1lz1                            | louj                              | 99                | V                   | A                   | 1.5                     | 1.8                     | 0.28        | -                               |
| 1lz1                            | ltcy                              | 63                | Y                   | F                   | 1.5                     | 1.7                     | 0.12        | Y                               |
| 1lz1                            | lwqm                              | 124               | Y                   | F                   | 1.5                     | 1.8                     | 0.24        | -                               |
| 1lz1                            | lwqn                              | 20                | Y                   | F                   | 1.5                     | 1.8                     | 0.25        | -                               |
| 1lz1                            | lwqo                              | 38                | Y                   | F                   | 1.5                     | 1.8                     | 0.27        | -                               |
| 1lz1                            | lwqp                              | 45                | Y                   | F                   | 1.5                     | 1.8                     | 0.24        | -                               |

|      |      |     |   |   |     |      |      |   |
|------|------|-----|---|---|-----|------|------|---|
| 1lz1 | lyam | 106 | I | V | 1.5 | 1.8  | 0.26 | - |
| 1lz1 | lyan | 23  | I | V | 1.5 | 1.8  | 0.27 | - |
| 1lz1 | lyao | 56  | I | V | 1.5 | 1.8  | 0.24 | - |
| 1lz1 | lyap | 59  | I | V | 1.5 | 1.8  | 0.26 | - |
| 1lz1 | lyaq | 89  | I | V | 1.5 | 1.8  | 0.25 | - |
| 1lz1 | 2hea | 106 | I | A | 1.5 | 1.8  | 0.28 | - |
| 1lz1 | 2heb | 23  | I | A | 1.5 | 1.8  | 0.3  | - |
| 1lz1 | 2hec | 56  | I | A | 1.5 | 1.8  | 0.23 | - |
| 1lz1 | 2hed | 59  | I | A | 1.5 | 1.8  | 0.27 | - |
| 1lz1 | 2hee | 59  | I | G | 1.5 | 1.8  | 0.25 | - |
| 1lz1 | 2hef | 89  | I | A | 1.5 | 1.8  | 0.23 | - |
| lvqb | lvqg | 47  | I | L | 1.8 | 1.8  | 0.07 | - |
| lvqb | lvqh | 47  | I | M | 1.8 | 1.8  | 0.08 | - |
| lvqb | lvqi | 47  | I | V | 1.8 | 1.8  | 0.09 | - |
| lvqb | lvqj | 35  | V | I | 1.8 | 1.8  | 0.07 | - |
| lvqb | lyhb | 41  | Y | F | 1.8 | 2.2  | 0.25 | - |
| 2ci2 | lcoa | 76  | I | V | 2.0 | 2.2  | 0.18 | - |
| 2lzm | ldya | 131 | V | D | 1.7 | 1.9  | 0.15 | - |
| 2lzm | ldyb | 131 | V | G | 1.7 | 1.75 | 0.15 | - |
| 2lzm | ldyc | 131 | V | I | 1.7 | 2.1  | 0.15 | - |
| 2lzm | ldyd | 131 | V | L | 1.7 | 2.1  | 0.17 | - |
| 2lzm | ldye | 131 | V | S | 1.7 | 1.8  | 0.14 | - |
| 2lzm | ldyf | 131 | V | M | 1.7 | 1.9  | 0.15 | - |
| 2lzm | ldyg | 131 | V | E | 1.7 | 2.1  | 0.18 | - |
| 2lzm | 1100 | 105 | Q | A | 1.7 | 1.9  | 0.26 | - |
| 2lzm | 1102 | 157 | T | A | 1.7 | 1.7  | 0.09 | - |
| 2lzm | 1103 | 157 | T | C | 1.7 | 1.7  | 0.13 | - |
| 2lzm | 1104 | 157 | T | D | 1.7 | 1.7  | 0.1  | - |
| 2lzm | 1106 | 157 | T | E | 1.7 | 1.7  | 0.1  | - |
| 2lzm | 1112 | 157 | T | N | 1.7 | 1.7  | 0.07 | - |
| 2lzm | 1113 | 157 | T | R | 1.7 | 1.7  | 0.07 | - |
| 2lzm | 1114 | 157 | T | S | 1.7 | 1.7  | 0.07 | - |
| 2lzm | 1115 | 157 | T | V | 1.7 | 1.7  | 0.07 | - |
| 2lzm | 1116 | 156 | G | D | 1.7 | 1.7  | 0.14 | - |
| 2lzm | 1117 | 3   | I | V | 1.7 | 1.7  | 0.14 | - |
| 2lzm | 1118 | 3   | I | Y | 1.7 | 1.7  | 0.25 | - |
| 2lzm | 1119 | 38  | S | D | 1.7 | 1.7  | 0.13 | - |
| 2lzm | 1120 | 144 | N | D | 1.7 | 1.85 | 0.15 | - |
| 2lzm | 1121 | 144 | N | D | 1.7 | 1.85 | 0.15 | - |
| 2lzm | 1122 | 124 | K | G | 1.7 | 1.7  | 0.19 | - |
| 2lzm | 1123 | 77  | G | A | 1.7 | 1.7  | 0.14 | - |
| 2lzm | 1124 | 82  | A | P | 1.7 | 1.7  | 0.13 | - |
| 2lzm | 1133 | 131 | V | A | 1.7 | 1.7  | 0.15 | - |
| 2lzm | 1134 | 96  | R | H | 1.7 | 1.9  | 0.17 | - |
| 2lzm | 1137 | 115 | T | E | 1.7 | 1.85 | 0.15 | - |
| 2lzm | 1138 | 123 | Q | E | 1.7 | 1.8  | 0.13 | - |
| 2lzm | 1142 | 16  | K | E | 1.7 | 1.8  | 0.15 | - |

|      |      |     |   |   |      |      |      |   |
|------|------|-----|---|---|------|------|------|---|
| 2lzm | 1144 | 119 | R | E | 1.7  | 1.7  | 0.16 | - |
| 2lzm | 1145 | 135 | K | E | 1.7  | 1.7  | 0.15 | - |
| 2lzm | 1146 | 147 | K | E | 1.7  | 1.7  | 0.16 | - |
| 2lzm | 1147 | 154 | R | E | 1.7  | 1.7  | 0.16 | - |
| 2lzm | 1148 | 98  | A | V | 1.7  | 1.7  | 0.2  | - |
| 2lzm | 1152 | 152 | T | S | 1.7  | 1.7  | 0.14 | - |
| 2lzm | 1153 | 149 | V | C | 1.7  | 1.85 | 0.31 | - |
| 2lzm | 1156 | 60  | K | P | 1.7  | 1.8  | 0.18 | - |
| 2lzm | 1157 | 116 | N | D | 1.7  | 1.9  | 0.17 | - |
| 2lzm | 1160 | 113 | G | A | 1.7  | 1.7  | 0.21 | - |
| 2lzm | 1169 | 133 | L | A | 1.7  | 1.9  | 0.17 | - |
| 2lzm | 1196 | 3   | I | P | 1.7  | 2.0  | 0.21 | - |
| 2lzm | 1198 | 105 | Q | E | 1.7  | 1.8  | 0.26 | - |
| 2lzm | 1199 | 105 | Q | G | 1.7  | 1.95 | 0.3  | - |
| 2rn2 | 1gob | 77  | G | A | 1.48 | 2.0  | 0.28 | - |
| 2rn2 | 1kva | 134 | D | A | 1.48 | 1.8  | 0.26 | - |
| 2rn2 | 1lav | 74  | V | L | 1.48 | 1.8  | 0.16 | - |
| 2rn2 | 1law | 74  | V | I | 1.48 | 1.8  | 0.17 | - |
| 2rn2 | 1rbr | 62  | H | P | 1.48 | 1.8  | 0.2  | - |
| 2rn2 | 1rbt | 95  | K | G | 1.48 | 1.8  | 0.16 | - |
| 2rn2 | 1rbu | 95  | K | N | 1.48 | 1.8  | 0.17 | - |
| 2rn2 | 1rbv | 95  | K | A | 1.48 | 1.8  | 0.13 | - |
| 2rn2 | 1rda | 10  | D | N | 1.48 | 2.15 | 0.23 | - |
| 2rn2 | 1rdb | 48  | E | Q | 1.48 | 1.9  | 0.21 | - |

\* Mutations that are predicted to cause structural effects are indicated as 'Y', whereas those predicted to cause no structural effects are indicated as '-'.

**Dataset S1B:** Disease-associated nsSNPs that are predicted in this paper. The information of the nsSNPs is shown in the following as *PDB ID\_chain-name\_nsSNP*:

|                |                |                |                |                |                |                |
|----------------|----------------|----------------|----------------|----------------|----------------|----------------|
| 1A00_C_A110D   | 1A00_C_A120E   | 1A00_C_A12D    | 1A00_C_A130D   | 1A00_C_A130P   | 1A00_C_A21D    | 1A00_C_A21P    |
| 1A00_C_A26E    | 1A00_C_A63D    | 1A00_C_A88S    | 1A00_C_D126V   | 1A00_C_D126Y   | 1A00_C_D6G     | 1A00_C_D6N     |
| 1A00_C_D6V     | 1A00_C_D6Y     | 1A00_C_D94Y    | 1A00_C_E116A   | 1A00_C_E27D    | 1A00_C_E27G    | 1A00_C_E27V    |
| 1A00_C_E30K    | 1A00_C_F43L    | 1A00_C_G18D    | 1A00_C_G18R    | 1A00_C_G51D    | 1A00_C_H103R   | 1A00_C_H112D   |
| 1A00_C_H45Q    | 1A00_C_H45R    | 1A00_C_H50R    | 1A00_C_H58Y    | 1A00_C_H87N    | 1A00_C_H87R    | 1A00_C_K11E    |
| 1A00_C_K127N   | 1A00_C_K139E   | 1A00_C_K139T   | 1A00_C_K56R    | 1A00_C_K56T    | 1A00_C_K61N    | 1A00_C_K61T    |
| 1A00_C_K99E    | 1A00_C_L109R   | 1A00_C_L113H   | 1A00_C_L125P   | 1A00_C_L129P   | 1A00_C_L136M   | 1A00_C_L136P   |
| 1A00_C_L2R     | 1A00_C_L34R    | 1A00_C_L48R    | 1A00_C_L80R    | 1A00_C_L91P    | 1A00_C_M76K    | 1A00_C_M76T    |
| 1A00_C_N97K    | 1A00_C_P114L   | 1A00_C_P114R   | 1A00_C_P37R    | 1A00_C_P77R    | 1A00_C_P95A    | 1A00_C_P95T    |
| 1A00_C_R141C   | 1A00_C_R141H   | 1A00_C_R141L   | 1A00_C_R141P   | 1A00_C_R92Q    | 1A00_C_S102R   | 1A00_C_S131P   |
| 1A00_C_S133R   | 1A00_C_S138P   | 1A00_C_S49R    | 1A00_C_S81C    | 1A00_C_S84R    | 1A00_C_T41S    | 1A00_C_V121M   |
| 1A00_C_V135E   | 1A00_C_V62M    | 1A00_C_W14R    | 1A00_C_Y140H   | 1A00_C_Y24H    | 1A00_D_D_A10D  | 1A00_D_D_A128D |
| 1A00_D_D_A129P | 1A00_D_D_A129V | 1A00_D_D_A135E | 1A00_D_D_A135P | 1A00_D_D_A138P | 1A00_D_D_A140D | 1A00_D_D_A140T |
| 1A00_D_D_A140V | 1A00_D_D_A142D | 1A00_D_D_A27D  | 1A00_D_D_A27S  | 1A00_D_D_A27V  | 1A00_D_D_A62D  | 1A00_D_D_A62P  |
| 1A00_D_D_A70D  | 1A00_D_D_A86D  | 1A00_D_D_C112R | 1A00_D_D_C112Y | 1A00_D_D_C93R  | 1A00_D_D_D21G  | 1A00_D_D_D21H  |
| 1A00_D_D_D21N  | 1A00_D_D_D21Y  | 1A00_D_D_D52A  | 1A00_D_D_D52H  | 1A00_D_D_D94G  | 1A00_D_D_D94H  | 1A00_D_D_D94N  |
| 1A00_D_D_D99E  | 1A00_D_D_E101D | 1A00_D_D_E101G | 1A00_D_D_E101K | 1A00_D_D_E101Q | 1A00_D_D_E22A  | 1A00_D_D_E22G  |
| 1A00_D_D_E22K  | 1A00_D_D_E22Q  | 1A00_D_D_E22V  | 1A00_D_D_E26K  | 1A00_D_D_E26V  | 1A00_D_D_E6A   | 1A00_D_D_E6K   |
| 1A00_D_D_E6Q   | 1A00_D_D_E6V   | 1A00_D_D_E7G   | 1A00_D_D_E7K   | 1A00_D_D_E90D  | 1A00_D_D_E90K  | 1A00_D_D_F103L |
| 1A00_D_D_F41Y  | 1A00_D_D_F42L  | 1A00_D_D_F45S  | 1A00_D_D_F71S  | 1A00_D_D_G107R | 1A00_D_D_G119A | 1A00_D_D_G136D |
| 1A00_D_D_G24D  | 1A00_D_D_G24R  | 1A00_D_D_G24V  | 1A00_D_D_G25D  | 1A00_D_D_G25R  | 1A00_D_D_H116Q | 1A00_D_D_H143D |
| 1A00_D_D_H143P | 1A00_D_D_H143Q | 1A00_D_D_H143R | 1A00_D_D_H146D | 1A00_D_D_H146L | 1A00_D_D_H146P | 1A00_D_D_H146Q |
| 1A00_D_D_H2L   | 1A00_D_D_H2Q   | 1A00_D_D_H2R   | 1A00_D_D_H2Y   | 1A00_D_D_H63Y  | 1A00_D_D_H92D  | 1A00_D_D_H92N  |
| 1A00_D_D_H92P  | 1A00_D_D_H92Q  | 1A00_D_D_H97L  | 1A00_D_D_H97P  | 1A00_D_D_H97Q  | 1A00_D_D_H97Y  | 1A00_D_D_K120E |
| 1A00_D_D_K120I | 1A00_D_D_K120Q | 1A00_D_D_K132N | 1A00_D_D_K132Q | 1A00_D_D_K144E | 1A00_D_D_K59E  | 1A00_D_D_K61E  |
| 1A00_D_D_K61M  | 1A00_D_D_K61N  | 1A00_D_D_K66T  | 1A00_D_D_K82M  | 1A00_D_D_K95M  | 1A00_D_D_K95N  | 1A00_D_D_L110P |
| 1A00_D_D_L114M | 1A00_D_D_L114P | 1A00_D_D_L141R | 1A00_D_D_L28P  | 1A00_D_D_L31P  | 1A00_D_D_L48P  | 1A00_D_D_L68H  |
| 1A00_D_D_L68P  | 1A00_D_D_L75P  | 1A00_D_D_L78R  | 1A00_D_D_L81R  | 1A00_D_D_L88P  | 1A00_D_D_L88R  | 1A00_D_D_L91P  |
| 1A00_D_D_L91R  | 1A00_D_D_L96V  | 1A00_D_D_N102S | 1A00_D_D_N102Y | 1A00_D_D_N108K | 1A00_D_D_N139D | 1A00_D_D_N139K |
| 1A00_D_D_N139Y | 1A00_D_D_P100L | 1A00_D_D_P100R | 1A00_D_D_P36R  | 1A00_D_D_P36S  | 1A00_D_D_P36T  | 1A00_D_D_P51R  |
| 1A00_D_D_Q131E | 1A00_D_D_Q131K | 1A00_D_D_Q131P | 1A00_D_D_Q131R | 1A00_D_D_Q39E  | 1A00_D_D_Q39R  | 1A00_D_D_R104T |
| 1A00_D_D_R30S  | 1A00_D_D_S49F  | 1A00_D_D_S89N  | 1A00_D_D_S89R  | 1A00_D_D_T38N  | 1A00_D_D_V109M | 1A00_D_D_V111A |
| 1A00_D_D_V11D  | 1A00_D_D_V11I  | 1A00_D_D_V126A | 1A00_D_D_V126E | 1A00_D_D_V126G | 1A00_D_D_V134E | 1A00_D_D_V34F  |
| 1A00_D_D_V60A  | 1A00_D_D_V67A  | 1A00_D_D_V67M  | 1A00_D_D_V98G  | 1A00_D_D_Y130D | 1A00_D_D_Y130S | 1A00_D_D_Y145C |
| 1A00_D_D_Y145H | 1A00_D_D_Y35F  | 1A01_C_A5D     | 1A01_C_A5P     | 1A01_C_D64Y    | 1A01_C_D75A    | 1A01_C_D75H    |
| 1A01_C_H72R    | 1A01_C_K40M    | 1A01_C_N78H    | 1A01_C_N78K    | 1A01_C_R31S    | 1A01_D_D_G29D  | 1A01_D_D_H117P |
| 1A01_D_D_H117R | 1A01_D_D_K17E  | 1A01_D_D_K17N  | 1A01_D_D_K17Q  | 1A01_D_D_K8Q   | 1A01_D_D_K8T   | 1A01_D_D_N19D  |
| 1A01_D_D_N19K  | 1A01_D_D_N19S  | 1A01_D_D_P124Q | 1A01_D_D_P124R | 1A01_D_D_P124S | 1A01_D_D_T123I | 1A01_D_D_V18M  |
| 1A01_D_D_V23D  | 1A01_D_D_V23F  | 1A01_D_D_V23G  | 1A01_D_D_V54D  | 1A0U_C_A71E    | 1A0U_C_A71V    | 1A0U_C_D74A    |
| 1A0U_C_D74G    | 1A0U_C_D74N    | 1A0U_C_E23G    | 1A0U_C_E23K    | 1A0U_C_H20Q    | 1A0U_C_H20R    | 1A0U_C_K16M    |
| 1A0U_C_K16N    | 1A0U_C_K90M    | 1A0U_C_P44L    | 1A0U_C_P44R    | 1A0U_D_D_D79Y  | 1A0U_D_D_G74R  | 1A0U_D_D_G74V  |
| 1A3N_D_V133L   | 1A3O_D_E43Q    | 1A8E_-_G258S   | 1ABY_A_G57R    | 1ABY_A_Q54R    | 1ABY_D_D_K65M  | 1ABY_D_D_K65N  |
| 1ABY_D_D_K65Q  | 1ABY_D_D_L14P  | 1ABY_D_D_L14R  | 1ABY_D_D_T84I  | 1AJ9_B_D73G    | 1AJ9_B_D73V    | 1AJ9_B_D73Y    |
| 1AJ9_B_N57K    | 1AJ9_B_V20M    | 1ALD_-_D128G   | 1APY_C_A78V    | 1APY_C_G37D    | 1APY_C_S49P    | 1APY_D_D_G279R |
| 1AZV_B_A4T     | 1AZV_B_A4V     | 1AZV_B_C6F     | 1AZV_B_D90A    | 1AZV_B_E100G   | 1AZV_B_E21K    | 1AZV_B_G16S    |
| 1AZV_B_G72S    | 1AZV_B_G85R    | 1AZV_B_H46R    | 1AZV_B_I113T   | 1AZV_B_I151T   | 1AZV_B_L106V   | 1AZV_B_L144F   |
| 1AZV_B_L144S   | 1BHG_A_A354V   | 1BHG_A_A619V   | 1BHG_A_R382C   | 1BHG_A_R611W   | 1BM7_A_A91S    | 1BM7_A_E89K    |
| 1BM7_A_K70N    | 1BM7_A_S77Y    | 1BZ4_A_G127D   | 1BZ4_A_R134Q   | 1BZ8_B_F64L    | 1BZ8_B_I84S    | 1BZ8_B_P102R   |
| 1BZ8_B_V30A    | 1BZ8_B_V30L    | 1BZ8_B_V30M    | 1BZE_B_S50I    | 1BZE_B_S50R    | 1BZY_D_D176V   | 1BZY_D_D176Y   |
| 1BZY_D_D193E   | 1BZY_D_D193N   | 1BZY_D_D51G    | 1BZY_D_H203D   | 1BZY_D_H203R   | 1BZY_D_M56T    | 1BZY_D_R44K    |
| 1BZY_D_S161R   | 1BZY_D_V52A    | 1BZY_D_V52M    | 1C9Y_A_E87K    | 1C9Y_A_G162R   | 1C9Y_A_K46R    | 1C9Y_A_L111P   |
| 1C9Y_A_L148F   | 1C9Y_A_L45P    | 1C9Y_A_L45V    | 1C9Y_A_M206R   | 1C9Y_A_N47I    | 1C9Y_A_P225L   | 1C9Y_A_P225T   |
| 1C9Y_A_Q216E   | 1C9Y_A_R129H   | 1C9Y_A_R277Q   | 1C9Y_A_R277W   | 1C9Y_A_R40C    | 1C9Y_A_R40H    | 1CBL_D_D47A    |
| 1CBL_D_D47G    | 1CBL_D_D47Y    | 1CBL_D_S44C    | 1CBM_D_A115D   | 1CBM_D_A115P   | 1DEH_B_R369C   | 1DEH_B_R47H    |
| 1EFV_A_G116R   | 1EFV_A_T266M   | 1EFV_A_V157G   | 1EFV_B_B_R164Q | 1EGC_D_C219R   | 1EGC_D_I350T   | 1EGC_D_M124I   |
| 1EGD_D_G242R   | 1FQY_A_A45V    | 1GBN_C_A270P   | 1GBN_C_H319Y   | 1GBN_C_N54K    | 1GBN_C_P241L   | 1GBN_C_R154L   |

|              |              |              |               |               |              |              |
|--------------|--------------|--------------|---------------|---------------|--------------|--------------|
| 1GBN_C_R180T | 1GBN_C_Y55H  | 1GBV_D_G46E  | 1GLI_D_A13D   | 1GLI_D_E121A  | 1GLI_D_E121G | 1GLI_D_E121K |
| 1GLI_D_E121Q | 1GLI_D_E121V | 1GUX_B_C712R | 1GUX_B_R661W  | 1HBS_G_A82D   | 1HBS_G_D47A  | 1HBS_G_D47G  |
| 1HBS_G_D47Y  | 1HBS_G_G59D  | 1HBS_G_G59V  | 1HBS_H_H_G16D | 1HBS_H_H_G16R | 1HBS_H_H_P5R | 1HBS_H_H_S9C |
| 1HCO_B_P58R  | 1HRY_A_F54S  | 1HRY_A_G40R  | 1HRY_A_I13T   | 1HRY_A_I35M   | 1HRY_A_K51I  | 1HRY_A_M9I   |
| 1HRY_A_V5A   | 1HRY_A_V5L   | 1HTI_B_C41Y  | 1HTI_B_E104D  | 1HTI_B_F240L  | 1HTI_B_G122R | 1HTI_B_I170V |
| 1LE2_-_Q81K  | 1OAT_C_A226V | 1OAT_C_C394R | 1OAT_C_C93F   | 1OAT_C_G353D  | 1OAT_C_G375A | 1OAT_C_L402P |
| 1OAT_C_P417L | 1OAT_C_R250P | 1OAT_C_V332M | 1OLG_C_G325V  | 1PAH_-_R158Q  | 1QAB_A_Y69H  | 1SOS_J_G41D  |
| 1SOS_J_G41S  | 1SOS_J_G93A  | 1SOS_J_G93C  | 1SOS_J_G93D   | 1SOS_J_G93R   | 1SOS_J_G93V  | 1SOS_J_S134N |
| 1SPD_B_A145T | 1TSR_A_A138P | 1TSR_A_C242F | 1TSR_A_C242S  | 1TSR_A_E258D  | 1TSR_A_E258K | 1TSR_A_G245A |
| 1TSR_A_G245C | 1TSR_A_G245D | 1TSR_A_G245S | 1TSR_A_G245V  | 1TSR_A_H168R  | 1TSR_A_I195T | 1TSR_A_L252P |
| 1TSR_A_L257P | 1TSR_A_M133T | 1TSR_A_R175C | 1TSR_A_R175G  | 1TSR_A_R175H  | 1TSR_A_R175L | 1TSR_A_R175P |
| 1TSR_A_R181L | 1TSR_A_R248A | 1TSR_A_R248G | 1TSR_A_R248L  | 1TSR_A_R248Q  | 1TSR_A_R248W | 1TSR_A_R249G |
| 1TSR_A_R249S | 1TSR_A_R273A | 1TSR_A_R273C | 1TSR_A_R273G  | 1TSR_A_R273H  | 1TSR_A_R280I | 1TSR_A_R280K |
| 1TSR_A_R280T | 1TSR_A_R282W | 1TSR_A_S241F | 1TSR_A_V143A  | 1TSR_A_V157D  | 1TSR_A_V157S | 1TSR_A_V272L |
| 1URO_A_E167K | 1URO_A_G281E | 1URO_A_L195F | 1URO_A_M165R  | 1URO_A_P62L   | 1URO_A_R292G | 1URO_A_R332H |
| 1YCS_A_P151A | 1YCS_A_P151S | 1YCS_A_P151T | 2CAB_-_G253R  | 2OAT_C_L437F  | 2OAT_C_R271K | 6PAX_A_G61V  |
| 6PAX_A_R23G  | 6PAX_A_V123D |              |               |               |              |              |

**Dataset S1C:** Non-disease-associated nsSNPs that are predicted in this paper. The information of the nsSNPs is shown in the following as *PDB ID\_chain-name\_nsSNP*:

|              |              |              |              |              |              |              |
|--------------|--------------|--------------|--------------|--------------|--------------|--------------|
| 13GS_A_A113V | 1A02_N_H419Y | 1A0L_D_D143N | 1A0L_D_G37D  | 1A0L_D_R187Q | 1A0L_D_T122A | 1A0L_D_T186S |
| 1A49_A_R338P | 1A6D_B_I101V | 1AD3_A_R11P  | 1ADL_-_T103P | 1AG8_D_A69V  | 1AG8_D_R90L  | 1AII_-_I220N |
| 1AII_-_P252L | 1AK6_-_R95S  | 1ALD_-_F144I | 1ANN_-_R43C  | 1AV1_D_A194G | 1AV1_D_D102H | 1AV1_D_K107M |
| 1AV1_D_R160P | 1AX8_-_V89M  | 1AXC_E_S39R  | 1BD9_B_H145Y | 1BD9_B_H26N  | 1BD9_B_V34A  | 1BGY_B_R169Q |
| 1BI9_D_S107G | 1BMO_B_R151G | 1BOY_-_R131W | 1BQQ_M_D273N | 1BRU_P_N233S | 1BSX_B_T337I | 1BUC_B_G343D |
| 1BY7_A_I114T | 1C46_A_T70N  | 1C5G_A_H25P  | 1C5G_A_R209H | 1C5G_A_T255N | 1C9Y_A_K46R  | 1C9Y_A_L111P |
| 1CB5_B_I443V | 1CJM_A_E151D | 1CJM_A_E151Q | 1CJM_A_G170R | 1CJM_A_H149Y | 1CJY_A_M130I | 1CJY_A_R657K |
| 1CP3_B_G66R  | 1CTS_-_P15L  | 1CTS_-_S378R | 1CW3_A_E487K | 1CX2_D_E486G | 1CX2_D_V509A | 1D1S_D_G79A  |
| 1D2V_D_N434Y | 1DE4_G_H41D  | 1DE4_G_M13T  | 1DG9_A_Q105R | 1DO8_C_G450E | 1DQV_A_P343T | 1DQV_A_V316L |
| 1DUU_A_L74M  | 1DVA_I_R204Q | 1DVA_I_V95D  | 1DXT_D_E7V   | 1E03_L_T115A | 1E1Q_B_G130S | 1E1Q_B_G92R  |
| 1E1Q_B_V88M  | 1E1Y_A_N187K | 1E4K_C_I85V  | 1E4K_C_S44N  | 1E9L_A_G102S | 1E9N_B_I64V  | 1E9N_B_Q51H  |
| 1ED3_D_H3R   | 1EEM_A_A140D | 1EJ1_B_S53T  | 1EKG_A_S202C | 1EL3_A_G203S | 1EL3_A_H41L  | 1EL3_A_I14F  |
| 1EL3_A_L72V  | 1EL3_A_T287I | 1EM6_A_R714S | 1EM6_A_V230E | 1ESL_-_S128R | 1EZV_A_K45R  | 1F2Q_A_K59R  |
| 1F2Q_A_S76N  | 1F45_B_M191T | 1F4R_A_R120C | 1F4R_A_R141Q | 1F5F_A_P156L | 1F5N_A_I78V  | 1F5N_A_K429R |
| 1F5N_A_N513Y | 1F5N_A_T203A | 1F5N_A_T481I | 1F6W_A_A436G | 1F6W_A_A436T | 1F6W_A_D438E | 1F6W_A_K445E |
| 1F8U_A_D74G  | 1F8U_A_H322N | 1F8U_A_V302E | 1FBL_-_D252G | 1FJM_B_V250L | 1FP3_B_D274G | 1FPU_A_L429V |
| 1FR8_B_H261R | 1FUJ_C_A119T | 1FUJ_C_T120S | 1FUU_B_P294L | 1G0U_L_G170V | 1G0U_Y_L146M | 1G0W_A_L360F |
| 1G0X_A_D123E | 1G0X_A_D129E | 1G6V_A_N253D | 1G8M_B_T117S | 1GGL_B_D18N  | 1GGL_B_M114L | 1GUH_B_A12T  |
| 1GUH_B_A216S | 1GUH_B_C112S | 1GUH_B_E210A | 1GUH_B_F10S  | 1GUH_B_I128L | 1GUH_B_I128T | 1GUH_B_K117Q |
| 1GUH_B_K125Q | 1GUH_B_P113Q | 1GUH_B_T19I  | 1GUH_B_V111L | 1GUH_B_V149A | 1H4U_A_V408G | 1H7X_C_R886H |
| 1H7X_C_V995F | 1HCI_A_Q516R | 1HDM_B_I172T | 1HDO_A_A70T  | 1HLC_B_V119I | 1HML_-_I27V  | 1HQ3_A_N110K |
| 1HSZ_B_N56K  | 1HT0_B_Q271R | 1HTI_B_G120A | 1HTI_B_G9V   | 1HW8_B_I638V | 1HWG_A_R64W  | 1HYN_Q_K56E  |
| 1HYN_Q_R112S | 1HYR_C_D113H | 1HYR_C_L122V | 1I1I_P_S394G | 1I5I_A_F5L   | 1I9S_A_M30I  | 1IAR_B_I50V  |
| 1IB1_D_V142E | 1IJQ_A_I567L | 1IJQ_A_P664S | 1IJQ_A_S609T | 1IJQ_A_V409M | 1IJQ_A_V447I | 1IJQ_A_W422C |
| 1IJQ_B_S566G | 1IM9_E_E253Q | 1IRL_-_L18R  | 1JEN_A_R128Q | 1JEN_A_R128W | 1KLT_-_H57R  | 1LFO_-_T94A  |
| 1LJR_B_A21T  | 1LJR_B_D140N | 1LJR_B_E172K | 1LJR_B_M139I | 1LJR_B_V118M | 1LVK_-_N219S | 1MHL_D_I551V |
| 1MKP_-_G296S | 1NDH_-_T88S  | 1PKM_-_C48R  | 1POE_B_L11F  | 1QLP_A_R101H | 1QLR_C_A9G   | 1QLR_C_D50G  |
| 1QLR_C_G24R  | 1QLR_C_P95H  | 1QLR_C_S67P  | 1RP1_-_S12F  | 1RRG_B_S147F | 1SGF_Z_E128Q | 1SGF_Z_E23K  |
| 1SGF_Z_V176E | 1SLM_-_R48K  | 1TND_A_G179D | 1TND_A_S224T | 1TRN_B_Y172C | 1WAB_-_R214G | 1XBR_A_G175D |
| 1XNA_A_R7L   | 1XNA_A_V10M  | 1ZXQ_-_R175H | 2ADA_-_K171N | 2BN2_A_P51L  | 2GTU_B_A129E | 2GTU_B_M133K |
| 2MYS_A_G699R | 2SHP_A_L88V  | 2SHP_A_V148E | 2SRC_-_A434D | 2SRC_-_D235V | 2SRC_-_I441F | 3ADK_-_I146M |
| 3ADK_-_R97Q  | 3GTU_D_V223I | 4P2P_-_N67K  |              |              |              |              |
